# Supplementary material for: Development of a reliable method for determination of N-nitrosamines in medicines using disposable pipette extraction and HPLC-MS analysis
Source: Royal Society of Chemistry journal article supplement (doi:10.1039/d4ay00554f), 2024-01-01
Supplement: d4ay00554f1.pdf [file d4ay00554f1.pdf]

**DEVELOPMENT OF A RELIABLE METHOD FOR N-NITROSAMINES IN  
MEDICINES DETERMINATION BY DISPOSABLE PIPETTE EXTRACTION AND  
HPLC-MS ANALYSIS**

**Almir Custodio Batista Junior<sup>1</sup>, Yuri Arrates Rocha<sup>1</sup>, Gabriela Guimarães Souza<sup>1</sup>,  
Andréa Rodrigues Chaves<sup>1\*</sup>**

<sup>1</sup> Federal University of Goiás, Chemistry Institute, Goiânia, Goiás 74690-900, Brazil  
[\\*andrea\\_chaves@ufg.br](mailto:*andrea_chaves@ufg.br)

**ELETRONIC SUPPLEMENTARY INFORMATION**

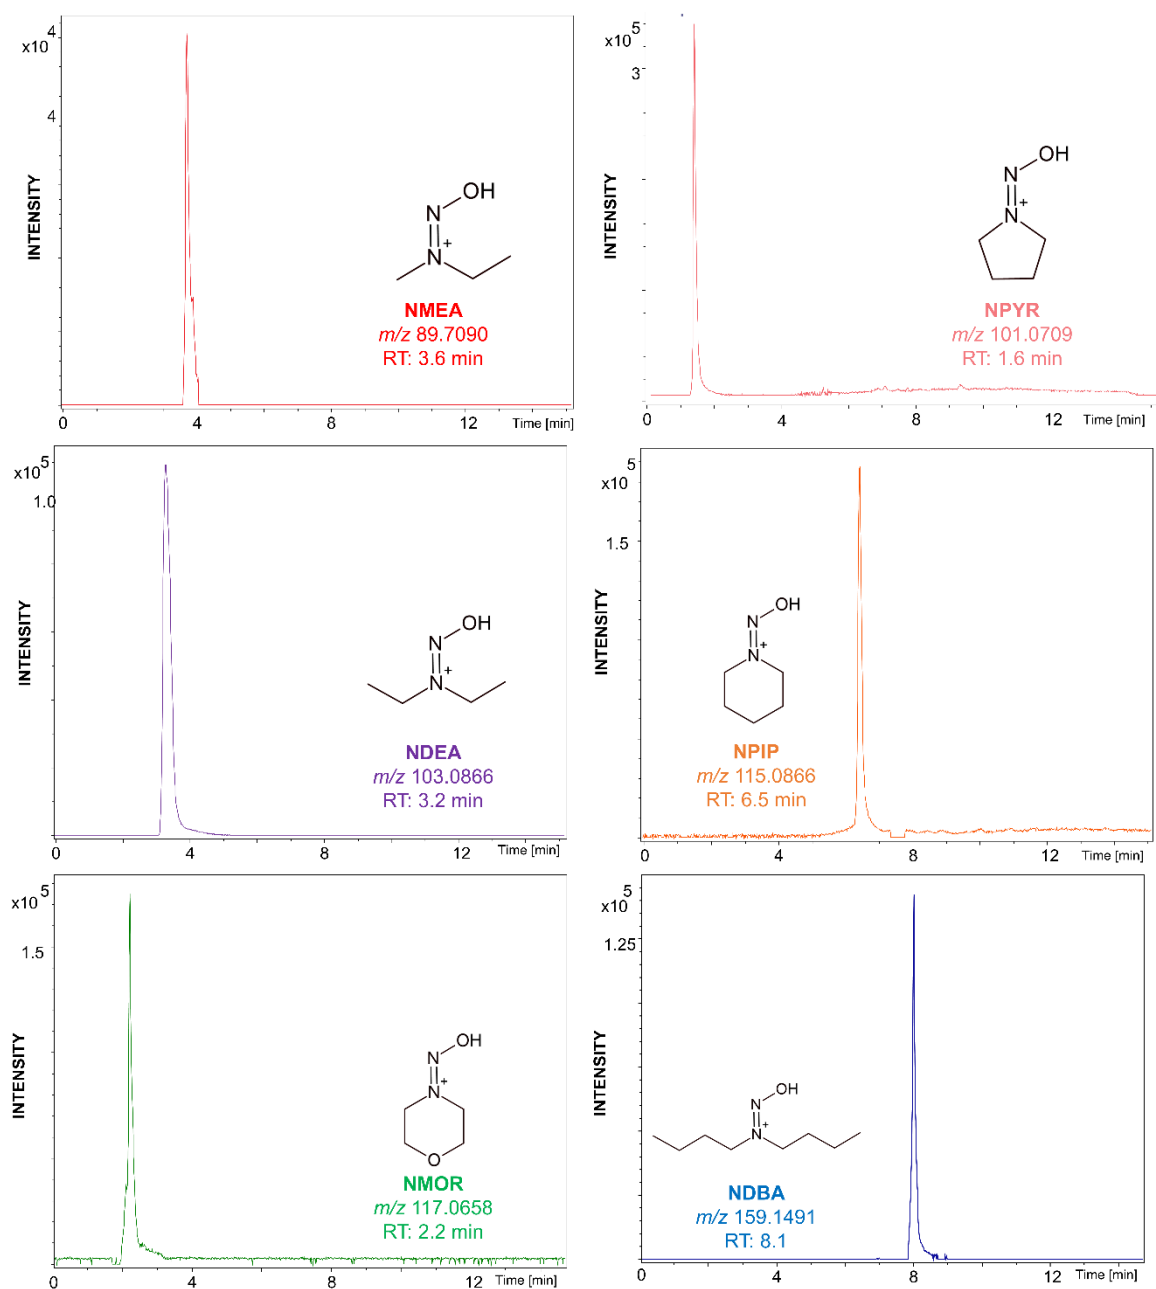

**RT:** Retention time; **NMEA:** N-nitroso-N-methylethylamine; **NPYR:** N-nitrosopyrrolidine; **NDEA:** N-nitrosodiethylamine; **NPIP:** N-nitrosopiperidine; **NMOR:** N-nitrosomorpholine; **NDBA:** N-nitroso-N-dibutylamine.

**Figure S1:** Extracted Ion Chromatogram for each N-nitrosamine analyzed by HPLC-MS

**Table S1:** Sorbents specifications obtained via its certificate of analysis.

| Extraction phase | Pore size<br>(Å) | Pore Volume<br>(mL g <sup>-1</sup> ) | Surface Area<br>(m <sup>2</sup> g <sup>-1</sup> ) | Particle size<br>(µm) |
|------------------|------------------|--------------------------------------|---------------------------------------------------|-----------------------|
| C8               | 60               | 0.8                                  | 500                                               | 40-63                 |
| C18              | 60               | 0.8                                  | 500                                               | 40-63                 |
| NH <sub>2</sub>  | 70               | 0.8                                  | 499                                               | 47-60                 |
| PH               | 73               | 0.8                                  | 462                                               | 54                    |
| HLB              | 80-200           | 1.5 – 2.6                            | 700-1025                                          | 35-45                 |
| CN               | 70               | 0.8                                  | 500                                               | 47-60                 |
| ENVI-CARB        | -                | -                                    | -                                                 | -                     |

**Table S2:** Experiments performed on the central composite design.

| Experiment | Block | pH  | DC | ET / s |
|------------|-------|-----|----|--------|
| 1          | 1     | 6.0 | 6  | 20.0   |
| 2          | 1     | 6.0 | 10 | 60.0   |
| 3          | 1     | 8.0 | 6  | 60.0   |
| 4          | 1     | 8.0 | 10 | 20.0   |
| 5 (C)      | 1     | 7.0 | 8  | 40.0   |
| 6 (C)      | 1     | 7.0 | 8  | 40.0   |
| 7          | 2     | 6.0 | 6  | 60.0   |
| 8          | 2     | 6.0 | 10 | 20.0   |
| 9          | 2     | 8.0 | 6  | 20.0   |
| 10         | 2     | 8.0 | 10 | 60.0   |
| 11 (C)     | 2     | 7.0 | 8  | 40.0   |
| 12 (C)     | 2     | 7.0 | 8  | 40.0   |
| 13         | 3     | 5.3 | 8  | 40.0   |
| 14         | 3     | 8.6 | 8  | 40.0   |
| 15         | 3     | 7.0 | 5  | 40.0   |
| 16         | 3     | 7.0 | 11 | 40.0   |
| 17         | 3     | 7.0 | 8  | 7.0    |
| 18         | 3     | 7.0 | 8  | 72.0   |
| 19 (C)     | 3     | 7.0 | 8  | 40.0   |

20 (C)                      3                      7.0                      8                      40.0

DC: Desorption cycles; ET: Equilibrium time.

**Table S3:** Comparison between the formulations of the commercial medicines.

| Commercial Medicine       | Excipients                                                                                                                                                           |
|---------------------------|----------------------------------------------------------------------------------------------------------------------------------------------------------------------|
| <b>LOSARTAN POTASSIUM</b> | Lactose monohydrate, microcrystalline cellulose, starch, silicon dioxide, croscarmellose sodium, magnesium stearate, titanium dioxide, macrogol, hypromellose.       |
| <b>VALSARTAN</b>          | Microcrystalline cellulose, silicon dioxide, lactose monohydrate, crospovidone, polyvinyl alcohol, magnesium stearate, titanium dioxide, macrogol, talc, iron oxide. |
| <b>IBUPROFEN</b>          | Lactose monohydrate, microcrystalline cellulose, croscarmellose sodium, silicon dioxide, stearyl sodium, hypromellose, titanium dioxide, macrogol, ethyl alcohol.    |

**Table S4:** Analytical greenness metric for the proposed DPX method

| Criteria                                                     | Score | Weight |
|--------------------------------------------------------------|-------|--------|
| 1 Sample preparation placement                               | 1.00  | 1      |
| 2 Hazardous materials                                        | 0.33  | 5      |
| 3 Sustainability, renewability, and reusability of materials | 0.25  | 2      |
| 4 Waste                                                      | 0.62  | 4      |
| 5 Size economy of the sample                                 | 1.00  | 2      |
| 6 Sample throughput                                          | 0.64  | 3      |
| 7 Integration and automation                                 | 0.25  | 2      |
| 8 Energy consumption                                         | 1.00  | 4      |
| 9 Post-sample preparation configuration for analysis         | 0.25  | 2      |
| 10 Operator's safety                                         | 0.75  | 3      |
